# Supplementary material
Source: publisher site journal article supplement (https://www.dovepress.com/get_supplementary_file.php?f=350192.docx)
Supplement: Supplementary file 1 [file get_supplementary_file.php]

| **Wang HQ & col., 2019 (32)** | + | + | + | + | - | - | + | + | + | + | **8** |
| --- | --- | --- | --- | --- | --- | --- | --- | --- | --- | --- | --- |
| **Zhao JG & col., 2009 (34)** | + | + | + | + | - | - | + | + | + | + | **8** |
| **Fink M & col., 2004 (33)** | + | + | + | + | - | + | - | + | + | + | **8** |
| **Wayne PM & col., 2005 (31)** | + | + | - | + | - | + | + | + | + | + | **8** |
| **Liu X & col., 2018 (36)** | + | + | + | + | - | + | + | + | + | + | **9** |
| **Liu W & col., 2008 (26)** | + | - | - | - | - | - | + | + | + | + | **5** |
| **Mukherjee M & col., 2007 (24)** | + | - | - | - | - | - | - | + | + | + | **4** |
| **Wang BH & col. 2014 (35)** | + | + | - | - | - | - | + | + | + | + | **6** |
| **Cai Y & col., 2021(30)** | + | + | + | - | - | + | + | + | + | + | **8** |
| **Sánchez-Mila Z & col., 2018(29)** | + | + | + | - | - | + | + | + | + | + | **8** |
| **Fakhari Z & col., 2017(25)** | - | - | - | - | - | - | + | + | - | + | **3** |
| **Mendigutia-Gómez A & col., 2016 (39)** | + | + | + | + | + | + | + | + | + | + | **10** |
| **Salom-Moreno J & col., 2014 (37)** | + | + | + | + | + | + | + | + | + | + | **10** |
| **Ghannadi S & col., 2018 (38)** | + | + | + | + | + | + | + | + | + | + | **10** |
| **Mendigutía-Gómez A & col., 2020 (28)** | + | + | + | - | - | + | + | + | + | + | **8** |
| **Cuenca Zaldívar JN & col., 2020 (27)** | - | - | + | - | - | + | + | + | + | - | **5** |
| **Title** | **Random assignment** | **Hidden assignment** | **Homogeneous groups** | **Blinded individuals** | **Blinded therapists** | **Blinded evaluators** | **Adequate follow-up** | **Intention to treat** | **Groups comparison** | **Specific measures and variability** | **Total** |

Annex II. Table 1. Qualitative assessment of the screened studies using the PEDro scale

| Name | Design and study purpose | Sample (n=) | Intervention | Measurement | Results |
| --- | --- | --- | --- | --- | --- |
| Wang HQ & col., 2019 (32) | Randomized double-blind RCT  To investigate the effect of acupuncture on the spastic lower limb in patients with haemorrhagic stroke | Total n=59  n (CG)=29  n (EG)=30 | CG: mobility exercises (6 consecutive days for 4 weeks)  EG: mobility exercises + acupuncture | Modified Asword Scale (MAS)  Short intracortical inhibition (SICI)  Hmax/Hmax ratio  Fugl-Meyer Assessment (FMA)  Barthel Index (BI)  Motor evoked potential (MEP)  Surface integrated electromyogram (IEMG) | The intervention group showed a significant decrease in MS in the knee and ankle (p = 0.002). In addition, the IEMG showed a reduction in agonist spastic muscles. |
| Zhao JG & col., 2009 (34) | Single-blind randomized RCT  To assess the effect of acupuncture on spasticity in patients who have suffered a stroke | Total n=120  n (CG)= 60  n (EG)=60 | 30 days of treatment  CG: traditional acupuncture  EG: acupuncture plus stimulation in the area of ​​the pyramidal muscle | Modified Asword Scale (MAS)  Barthel Index (BI)  Fugl-Meyer Assessment (FMA)  Electromyographic activity | The intervention group showed a significant decrease in the MAS scale compared to the control group in the upper limb (P <0.05). In addition, there were improvements in the parameters (FMA, BI and F / M ratio) in the treatment group |
| Fink M & col., 2004  (33) | Single-blind randomized RCT  Determine what type of needle is the most suitable to reduce spasticity in the leg muscles of people suffering from chronic stroke | Total n= 25  n (CG)= 12  n (EG)= 13 | CG: blunt needle, in skin points not normally used in acupuncture  EG: 2 acupuncture sessions for 8 weeks | Modified Asword Scale (MAS)  Pain (visual analog scale)  Walking speed | No beneficial clinical effects were demonstrated in the treatment group compared to the control group |
| Wayne PM & col., 2005 (31) | Randomized controlled RCT  Compare the effect of traditional Chinese acupuncture with sham acupuncture on the upper limb | Total n=33  n (CG)= 17  n (EG)=16 | CG: 20 sessions over 10 and a half weeks of sham acupuncture  EG: 20 sessions over 10 and a half weeks of traditional Chinese acupuncture including electro acupuncture | Motor function  Spasticity  Grip force  Range of motion (ROM)  Daily life activities | No statistically significant changes were found between the control group and the intervention group in the variables studied. |
| Liu X & col., 2018 (36) | Single-blind randomized RCT  To determine the clinical efficacy and safety of electro acupuncture (EA) in the treatment of patients with chronic ischemic stroke | Total n=74  n (CG)=37  n (EG)=37 | CG: one acupuncture session for 28 days  EG: one acupuncture session for 28 days + one scalp electro acupuncture session | NIH Stroke Scale (NIHSS)  Fugl-Meyer Assessment (FMA)  Modified Barthel Index Score (MBI) | No significant changes were shown in the parameters studied in the treatment group compared to the control group. |
| Liu W & col., 2008 (26) | RCT  To study and compare the functional motor improvement of the upper limb in chronic stroke patients | Total n=10 | CG: strength training  EG: strength training + two electro acupuncture sessions for 6 weeks | Active wrist extension (ROM)  Isometric wrist strength.  Fugl-Meyer Assessment (FMA) | EG: there were significant improvements in the level of spasticity (P <0.01), active wrist extension, and the FMA score, although there were no significant changes in isometric wrist strength. |
| Mukherjee M & col., 2007 (24) | RCT  Quantify changes in spasticity in the wrist joint in patients with chronic stroke after electro acupuncture treatment | Total n=7 | CG: strengthening twice a week for 6 weeks  EG: strengthening twice a week for 6 weeks + electro acupuncture | Muscle strength and spasticity: Biodex multi joint System 3 Pro  Reflex Rate Sensitivity (VASRT)  Segmented Averaged Speed-dependent Reflex Torque (SASRT)  Modified Asword Scale (MAS)  Electromyographic activity of the wrist flexors | VASRT was significantly reduced in the combined treatment group (P = 02). MAS scores also showed a significant reduction (P <0.01). Electromyographic activity showed a tendency to decrease after combined treatment |
| Wang BH & col. 2014 (35) | Randomized RCT  To study the clinical efficacy of electro acupuncture (EA) in the upper limb in chronic stroke patients. | Total n=15  n (CG)=9  n (EG)=6 | 12 sessions, 2 weekly sessions during 6 weeks  CG: Conventional rehabilitation (joint mobility exercises, stretching, strengthening, balance work) + minimal acupuncture  EG: Conventional rehabilitation + EA session (20 min) | Angle of muscle reaction  Range of motion (ROM)  Dynamic component (goniometer) | The experimental group showed significant improvement at the dynamic component in the elbow joint after 6 weeks of treatment (P=0.0149) |
| Cai & & col., 2021 (30) | Randomized RCT  To determine the safety of electro acupuncture (EA) in spasticity | Total n=25  n (CG)= 13  n (EG)=12 | CG: 12 sessions of conventional physiotherapy  GA: 12 sessions of conventional physiotherapy + 12 sessions of EA (3 sessions per week during 4 weeks) | Modified Asword Scale (MAS)  Fugl-Meyer Assessment (FMA)  Modified Barthel Index Score (MBI) | They did not find significant improvements in any of the parameters studied between the two study groups. |
| Sánchez-Mila Z & col., 2018 (39) | Randomized RCT  To determine the effects of dry needling in the treatment of sessions together with Bobath therapy in the patient with spasticity. | Total n= 26  n (CG)= 12  n (EG)=14 | CG: Bobath Therapy (stretching, strengthening exercises)  EG: Bobath therapy + an ultrasound-guided dry needling session in the posterior tibialis | Modified Asword Scale (MAS)  Fugl-Meyer Assessment (FMA)  Posturography (SMART EquiTest System) | The results yielded significant evidence that the experimental group lowered the spasticity tone (P <0.001). In addition, the patients in the experimental group improved balance and range of mobility measured with FMA than the control group. |
| Fakhari Z & col., 2017 (25) | RCT pretest-posttest  To explore the effects of dry needling on the flexor muscles of a spastic wrist in stroke patients | Total n=29 | All participants received a dry needling application to the flexor carpi radialis and flexor carpi ulnaris, one minute per muscle | Modified Asword Scale (MAS)  Passive resistance to movement  Active and passive ROMBox and Block Test  FCR H-reflex | Significant reductions in the MAS score were shown immediately after dry needling and one hour after dry needling. (P<0.001). |
| Mendigutia-Gómez A & col., 2016 (39) | Double blind RCT  To determine the effects of dry needling on spastic shoulder muscles in stroke patients. | Total n=20  n (CG)= 10  n (EG)=10 | CG: 3 sessions, one per week of conventional physiotherapy (unilateral training, Bobath therapy, strength training)  EG: 3 sessions, one per week of conventional physiotherapy + dry needling session in the periarticular shoulder muscles | Modified Asword Scale (MAS)  Pressure pain in the deltoid, infraspinatus, and zygapophyseal joint  ROM glenohumeral joint | There was a similar reduction in spasticity at both groups in the upper trapezius, pectoralis major and subscapularis. However, there was an improvement in external rotation at the group that received dry needling. (P<0.05) |
| Salom-Moreno J & col., 2014 (37) | Randomized double-blind RCT  Determine the effects of dry needling on spasticity, tenderness and plantar pressure in stroke patients. | Total n=34  n (CG)= 17  n (EG)=17 | CG: patients did not receive any intervention  EG: Patients received a dry needling session in the anterior tibial and gastrocnemius muscle | Modified Asword Scale (MAS)  Plantar pressure (baropodometry) | A large number of participants in the EG lowered their level of spasticity (P<0.001) |
| Ghannadi S & col., 2018 (38) | Randomized double-blind RCT  To investigate the effects of deep dr& needling at lower limb in patients with spasticity who have suffered a stroke | Total n=24  n (CG)= 10  n (EG)=10 | 3 sessions (1 per week)  CG: simulated dry needling session  EG: deep dry needling session | Modified Asword Scale (MAS)  Timed up and go test  10-meter walk test  ROM (active and passive ankle)  One leg stability testModified Barthel Index Score (MBI) | The results showed significant improvements in MAS, time up and go test, 10-meter walk test, MBI and passive ROM of the EG compared to the CG. (P<0.05) |
| Mendigutía-Gómez A & col., 2020 (28) | Randomized RCT  Study if there are pain changes and effects in the inclusion of dry needling session in the spastic shoulder treatment | Total n=16  n (CG)=8  n (EG)=8 | CG: One conventional physiotherapy session (one-sided arm training, Bobath, strength training)  EG: conventional physiotherapy session + dry needling in shoulder muscles | Numerical pain rating scale (NPRS, 0-10) dry needling after 1 minute, 24 hours and 72 hours | Dry needling significantly reduces pain after 24 and 72 hours (P<0.001) |
| Cuenca Zaldívar JN & col., 2020 (27) | Non-randomized RCT  Determine the efficacy of dry needling in the upper limb in stroke patients | Total n=80  n (CG)= 40  n (EG)=40 | CG: 8 weeks of conventional physiotherapy treatment  EG: 8 weeks of conventional physiotherapy treatment + 6 dry needling sessions in arm flexor muscles | Modified Asword Scale (MAS)  Fugl-Meyer Assessment (FMA)  Resistance to passive movement scale (REPAS)  Numeric Pain Rating Scale 0-10 (NPRS) | EG participants showed a significant reduction in spasticity, graded as  REPAS (P<0.001) & MAS (P<0.05) |

Annex III. Table II. Synthesis of the screened studies results

Annex I. Information Flow chart

Studies included in this review

n=16

**Information Flow chart**

Total studies screened

n= 112

**Excluded studies**

**n= 96**

Chinese written n= 8

Patients do not have spasticity n= 23

They are not clinical trials n= 9

Non-human subjects n= 2

Study in children with PCI n=5

They do not use the therapies under study n=32

Not with clinical trials n= 17

Studies screened after reading the full text

n=16

Studies screened after reading title and abstract

n= 16

Total duplicate studies removed

n= 9

Studies identified in database searches

n= 121
